# Supplementary material for: Amazonian Anopheles with low numbers of oocysts transmit Plasmodium vivax sporozoites during a blood meal
Source: PubMed Central journal article supplement (PMC9663451; doi:10.1038/s41598-022-24058-z), 2022-11-14

## **Amazonian *Anopheles* with low numbers of oocysts transmit *Plasmodium vivax* sporozoites during a blood meal**

Jordam William Pereira-Silva<sup>1,3,4\*</sup>, Keillen Monick Martins-Campos<sup>1</sup>, José Vicente Ferreira-Neto<sup>1,5</sup>, Marcus Vinicius Guimarães Lacerda<sup>2,3,4</sup>, Felipe Arley Costa Pessoa<sup>1,5</sup> & Claudia María Ríos-Velásquez<sup>1,4\*</sup>

1. Laboratório de Ecologia de Doenças Transmissíveis na Amazônia, Instituto Leônidas e Maria Deane, Fundação Oswaldo Cruz - FIOCRUZ, Manaus, Amazonas, Brasil.

2. Laboratório de Diagnóstico e Controle de Doenças Infecciosas na Amazônia, Instituto Leônidas e Maria Deane, Fundação Oswaldo Cruz - FIOCRUZ, Manaus, Amazonas, Brasil.

3. Fundação de Medicina Tropical Dr. Heitor Vieira Dourado, Manaus, Amazonas, Brasil.

4. Programa de Pós-graduação em Medicina Tropical, Escola Superior de Ciências da Saúde, Universidade do Estado do Amazonas, Manaus, Brasil.

5. Programa de Pós-Graduação em Entomologia, Instituto Nacional de Pesquisas da Amazônia, Manaus, Amazonas, Brasil.

\*Corresponding Authors: Claudia María Ríos-Velásquez, Jordam William Pereira-Silva. Instituto Leônidas e Maria Deane - FIOCRUZ Amazônia, Laboratório de Ecologia de Doenças Transmissíveis na Amazônia, Rua Teresina, 476, Adrianópolis, Manaus, Amazonas, CEP: 69.057-070, Brasil. E-mail: claudia.rios@fiocruz.br; jordamwilliam@gmail.com

**Supplementary Figure 1.** Gel electrophoresis image showing 100 bp band indicating amplified of *P. vivax* in the saliva of six species of *Anopheles*. (L) DNA Ladder; (1) *An. triannulatus* s.l.; (2) *An. nuneztovari* s.l.; (3) *An. benarrochi* s.l.; (4) *An. evansae*; (5) *An. darlingi*; (6) *An. aquasalis*; (7) Positive control (salivary gland + *P. vivax*); (8) Positive control (midgut + *P. vivax*); (9) Negative control.

L 1 2 3 4 5 6 7 8 9

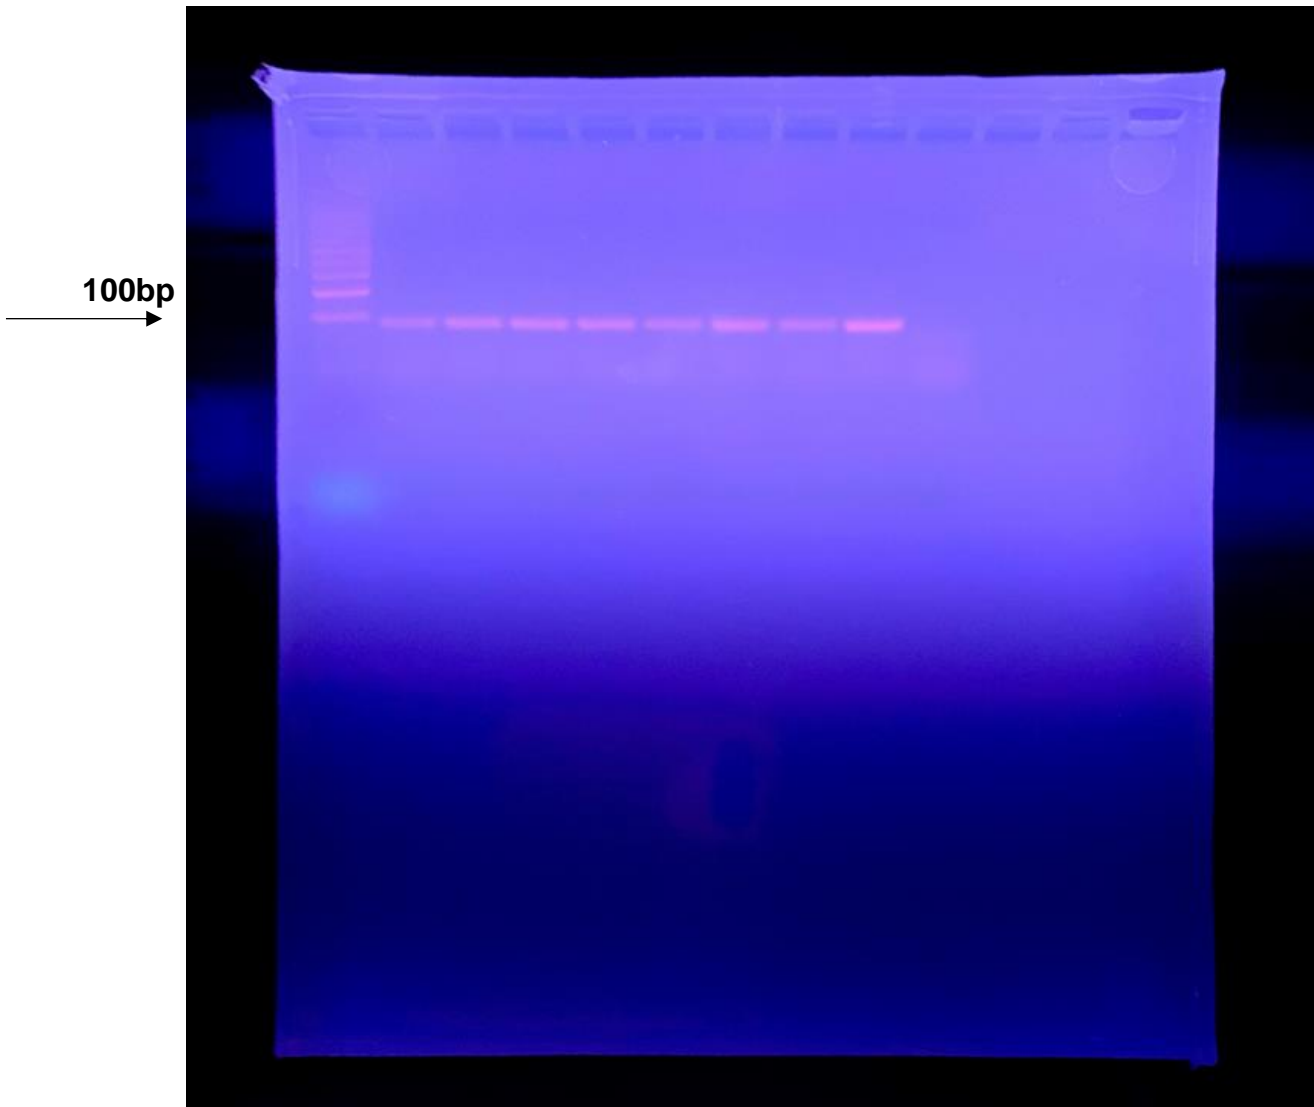

Supplement: 41598_2022_24058_MOESM1_ESM.pdf [file 41598_2022_24058_MOESM1_ESM.pdf]
